# Supplementary material
Source: publisher site journal article supplement (https://www.spandidos-publications.com/2843/downloadSupplementary)
Supplement: Supplementary file 1 [file downloadSupplementary]

## Sheet: TargetScan7
Table S1. The miRNAs regulate the ACE2 protein
miRNA	Position in the UTR	seed match	context++ score	context++ score percentile	weighted context++ score	conserved branch length	Pct
Conserved sites
hsa-miR-200b-3p	179-185	7mer-m8	-0.23	96	-0.23	3.164	0.4
hsa-miR-200c-3p	179-185	7mer-m8	-0.23	96	-0.23	3.164	0.4
hsa-miR-429	179-185	7mer-m8	-0.2	95	-0.2	3.164	0.4
Poorly conserved sites
hsa-miR-3125	15-21	7mer-m8	-0.24	96	-0.24	0	N/A
hsa-miR-3916	15-21	7mer-m8	-0.22	95	-0.22	0	N/A
hsa-miR-6859-5p	15-21	7mer-m8	-0.15	94	-0.15	0	N/A
hsa-miR-335-5p	18-24	7mer-1A	-0.07	81	-0.07	1.638	N/A
hsa-miR-1306-5p	23-29	7mer-1A	-0.22	91	-0.22	3.069	< 0.1
hsa-miR-8063	28-34	7mer-m8	-0.1	96	-0.1	0	N/A
hsa-miR-3065-5p	31-37	7mer-m8	-0.13	87	-0.13	0	N/A
hsa-miR-3529-3p	32-39	8mer	-0.28	98	-0.28	0	N/A
hsa-miR-3143	44-51	8mer	-0.2	96	-0.2	0	N/A
hsa-miR-543	44-50	7mer-1A	-0.03	83	-0.03	2.118	N/A
hsa-miR-302c-5p	45-51	7mer-m8	-0.13	94	-0.13	0	N/A
hsa-miR-7153-3p	55-61	7mer-1A	-0.25	96	-0.25	0	N/A
hsa-miR-1284	59-65	7mer-1A	-0.15	76	-0.15	0.024	N/A
hsa-miR-7159-3p	61-67	7mer-1A	-0.08	86	-0.08	0	N/A
hsa-miR-4482-3p	61-67	7mer-1A	-0.04	79	-0.04	0	N/A
hsa-miR-136-3p	74-80	7mer-1A	-0.22	96	-0.22	0	N/A
hsa-miR-374a-3p	76-82	7mer-1A	-0.18	93	-0.18	0.085	N/A
hsa-miR-144-5p	83-89	7mer-1A	-0.22	92	-0.22	0	N/A
hsa-miR-580-5p	86-92	7mer-1A	-0.11	91	-0.11	0	N/A
hsa-miR-489-3p	94-100	7mer-1A	-0.08	86	-0.08	0.665	0.14
hsa-miR-514b-3p	95-101	7mer-1A	-0.12	85	-0.12	0.099	N/A
hsa-miR-514a-3p	95-101	7mer-1A	-0.12	85	-0.12	0.099	N/A
hsa-miR-2052	97-103	7mer-m8	-0.13	86	-0.13	0	N/A
hsa-miR-4797-5p	108-114	7mer-m8	-0.12	95	-0.12	0	N/A
hsa-miR-4539	113-119	7mer-1A	-0.12	90	-0.12	0	N/A
hsa-miR-4762-3p	115-121	7mer-1A	-0.09	85	-0.09	0	N/A
hsa-miR-4520-2-3p	128-135	8mer	-0.47	98	-0.47	0	N/A
hsa-miR-4520-3p	128-134	7mer-1A	-0.15	83	-0.15	0	N/A
hsa-miR-7850-5p	129-135	7mer-m8	-0.16	97	-0.16	0	N/A
hsa-miR-4529-3p	129-135	7mer-1A	-0.16	77	-0.16	0	N/A
hsa-miR-9-5p	131-137	7mer-1A	-0.06	77	-0.06	2.815	0.15
hsa-miR-511-5p	133-140	8mer	-0.03	72	-0.03	0.024	N/A
hsa-miR-6830-3p	133-139	7mer-1A	-0.01	29	-0.01	0	N/A
hsa-miR-6755-3p	136-142	7mer-1A	-0.25	87	-0.25	0	N/A
hsa-miR-4716-5p	139-145	7mer-m8	-0.08	81	-0.08	0	N/A
hsa-miR-3187-3p	142-149	8mer	-0.31	98	-0.31	0	N/A
hsa-miR-4529-5p	142-148	7mer-1A	-0.15	78	-0.15	0	N/A
hsa-miR-548s	143-149	7mer-1A	-0.18	93	-0.18	0	N/A
hsa-miR-4701-5p	143-149	7mer-1A	-0.1	83	-0.1	0.024	N/A
hsa-miR-588	143-149	7mer-1A	-0.1	83	-0.1	0.024	N/A
hsa-miR-4435	143-149	7mer-1A	-0.15	81	-0.15	0	N/A
hsa-miR-212-5p	145-152	8mer	-0.36	97	-0.36	0.144	< 0.1
hsa-miR-3189-3p	146-152	7mer-1A	-0.15	83	-0.15	0	N/A
hsa-miR-6845-3p	149-156	8mer	-0.29	96	-0.29	0	N/A
hsa-miR-7110-3p	151-157	7mer-m8	-0.17	82	-0.17	0	N/A
hsa-miR-4699-5p	159-165	7mer-1A	-0.01	22	-0.01	0	N/A
hsa-miR-513b-3p	167-173	7mer-m8	-0.07	71	-0.07	0	N/A
hsa-miR-3908	170-176	7mer-m8	-0.14	94	-0.14	0	N/A
hsa-miR-4766-5p	175-181	7mer-m8	-0.11	93	-0.11	0.489	N/A
hsa-miR-4724-5p	177-183	7mer-1A	-0.1	89	-0.1	0	N/A
hsa-miR-4524a-3p	191-197	7mer-m8	-0.23	92	-0.23	0.024	N/A
hsa-miR-520a-5p	195-201	7mer-m8	-0.22	93	-0.22	0.085	N/A
hsa-miR-525-5p	195-201	7mer-m8	-0.2	91	-0.2	0.085	N/A
hsa-miR-4762-5p	200-206	7mer-1A	-0.12	88	-0.12	0	N/A
hsa-miR-4773	210-216	7mer-m8	-0.2	96	-0.2	0	N/A
hsa-miR-589-3p	211-217	7mer-m8	-0.17	92	-0.17	0	N/A
hsa-miR-3653-3p	219-225	7mer-1A	-0.08	86	-0.08	0	N/A
hsa-miR-3658	219-225	7mer-m8	-0.05	78	-0.05	0	N/A
hsa-miR-4477a	221-228	8mer	-0.06	85	-0.06	0	N/A
hsa-miR-500a-5p	227-233	7mer-m8	-0.18	94	-0.18	0.099	N/A
hsa-miR-4668-3p	229-235	7mer-m8	-0.04	93	-0.04	0	N/A
hsa-miR-8063	230-236	7mer-m8	-0.05	92	-0.05	0	N/A
hsa-miR-374c-5p	235-241	7mer-m8	-0.08	69	-0.08	0.462	N/A
hsa-miR-655-3p	235-241	7mer-m8	-0.08	68	-0.08	0.462	N/A
hsa-miR-5684	240-246	7mer-1A	-0.2	91	-0.2	0	N/A
hsa-miR-1277-5p	245-251	7mer-1A	-0.01	40	-0.01	0	N/A
hsa-miR-6883-3p	250-256	7mer-1A	-0.21	92	-0.21	0	N/A
hsa-miR-4446-5p	251-257	7mer-m8	-0.11	84	-0.11	0	N/A
hsa-miR-4755-5p	251-257	7mer-1A	-0.07	78	-0.07	0	N/A
hsa-miR-5006-3p	251-257	7mer-1A	-0.07	78	-0.07	0	N/A
hsa-miR-216b-3p	256-262	7mer-m8	-0.16	91	-0.16	0	N/A
hsa-miR-603	257-264	8mer	-0.29	99	-0.29	0.085	N/A
hsa-miR-3941	258-264	7mer-m8	-0.18	92	-0.18	0	N/A
hsa-miR-329-3p	258-264	7mer-1A	-0.11	91	-0.11	0.546	N/A
hsa-miR-362-3p	258-264	7mer-1A	-0.09	88	-0.09	0.546	N/A
hsa-miR-8485	258-264	7mer-1A	-0.11	76	-0.11	0	N/A
hsa-miR-4786-5p	267-274	8mer	-0.31	97	-0.31	0	N/A
hsa-miR-769-5p	268-274	7mer-1A	-0.15	88	-0.15	0.085	N/A
hsa-miR-4677-3p	271-277	7mer-m8	-0.15	88	-0.15	0	N/A
hsa-miR-6811-3p	273-279	7mer-m8	-0.19	89	-0.19	0	N/A
hsa-miR-345-3p	282-289	8mer	-0.18	95	-0.18	0	N/A
hsa-miR-670-5p	283-289	7mer-m8	-0.17	94	-0.17	0	N/A
hsa-miR-4732-3p	283-289	7mer-1A	-0.13	90	-0.13	0	N/A
hsa-miR-4319	283-289	7mer-1A	-0.17	85	-0.17	0.47	< 0.1
hsa-miR-125a-5p	283-289	7mer-1A	-0.13	78	-0.13	0.47	< 0.1
hsa-miR-125b-5p	283-289	7mer-1A	-0.13	78	-0.13	0.47	< 0.1
hsa-miR-188-5p	285-291	7mer-1A	-0.13	83	-0.13	0.709	N/A
hsa-miR-6866-3p	285-291	7mer-1A	-0.09	83	-0.09	0.709	N/A
hsa-miR-4760-5p	291-298	8mer	-0.2	94	-0.2	0	N/A
hsa-miR-8061	291-298	8mer	-0.2	94	-0.2	0	N/A
hsa-miR-376a-5p	291-297	7mer-1A	-0.01	45	-0.01	0.085	N/A
hsa-miR-421	308-315	8mer	-0.29	97	-0.29	0.231	N/A
hsa-miR-4709-5p	308-314	7mer-1A	-0.13	89	-0.13	0	N/A
hsa-miR-7159-5p	309-315	7mer-1A	-0.09	77	-0.09	0	N/A
hsa-miR-505-3p.2	309-315	7mer-1A	-0.01	46	-0.01	0.231	N/A
hsa-miR-4272	310-316	7mer-m8	-0.13	94	-0.13	0	N/A
hsa-miR-1305	324-331	8mer	-0.23	99	-0.23	0	N/A
hsa-miR-500b-5p	332-339	8mer	-0.39	99	-0.39	0.132	N/A
hsa-miR-362-5p	332-339	8mer	-0.39	99	-0.39	0.132	N/A
hsa-miR-501-5p	333-339	7mer-1A	-0.07	69	-0.07	0.085	N/A
hsa-miR-6772-3p	347-353	7mer-1A	-0.19	88	-0.19	0	N/A
hsa-miR-505-3p.1	349-360	non-canonical	N/A	N/A	N/A	0	N/A
hsa-miR-505-3p.1	349-360	non-canonical	N/A	N/A	N/A	0	N/A
hsa-miR-300	363-369	7mer-m8	-0.03	79	-0.03	1.286	N/A
hsa-miR-381-3p	363-369	7mer-m8	-0.02	65	-0.02	1.286	N/A
hsa-miR-587	367-373	7mer-m8	-0.05	67	-0.05	0.024	N/A
hsa-miR-7151-5p	378-384	7mer-m8	-0.11	89	-0.11	0	N/A
hsa-miR-640	380-386	7mer-m8	-0.15	83	-0.15	0.099	N/A
hsa-miR-1245a	382-388	7mer-m8	-0.15	90	-0.15	0.024	N/A
hsa-miR-8079	382-388	7mer-m8	-0.15	90	-0.15	0.024	N/A
hsa-miR-6882-5p	386-392	7mer-1A	-0.01	37	-0.01	0	N/A
hsa-miR-6760-3p	395-401	7mer-m8	-0.06	75	-0.06	0	N/A
hsa-miR-6715b-5p	399-405	7mer-m8	-0.15	90	-0.15	0	N/A
hsa-miR-4269	399-405	7mer-m8	-0.09	89	-0.09	0	N/A
hsa-miR-4673	400-406	7mer-m8	-0.12	84	-0.12	0.085	N/A
hsa-miR-4645-5p	400-406	7mer-m8	-0.11	83	-0.11	0.085	N/A
hsa-miR-6840-3p	402-408	7mer-1A	-0.08	88	-0.08	0	N/A
hsa-miR-4726-3p	402-408	7mer-1A	-0.09	84	-0.09	0	N/A
hsa-miR-6764-5p	402-408	7mer-1A	-0.09	82	-0.09	0	N/A
hsa-miR-1915-3p	402-408	7mer-1A	-0.07	76	-0.07	0	N/A
hsa-miR-7977	403-409	7mer-1A	-0.01	33	-0.01	0	N/A
hsa-miR-584-3p	406-412	7mer-m8	-0.09	77	-0.09	0	N/A
hsa-miR-5690	415-421	7mer-m8	-0.16	92	-0.16	0	N/A
hsa-miR-5047	417-424	8mer	-0.3	96	-0.3	0	N/A
hsa-miR-1301-3p	417-424	8mer	-0.3	96	-0.3	0	N/A
hsa-miR-4660	417-423	7mer-1A	-0.06	62	-0.06	0.024	N/A
hsa-miR-7156-3p	418-424	7mer-1A	-0.09	72	-0.09	0	N/A
hsa-miR-6841-3p	420-427	8mer	-0.23	89	-0.23	0	N/A
hsa-miR-502-5p	421-427	7mer-m8	-0.16	88	-0.16	0.099	N/A
hsa-miR-1915-5p	421-427	7mer-1A	-0.09	63	-0.09	0	N/A
hsa-miR-362-5p	422-428	7mer-m8	-0.1	77	-0.1	0.245	N/A
hsa-miR-500b-5p	422-428	7mer-m8	-0.08	73	-0.08	0.245	N/A
hsa-miR-500a-5p	423-429	7mer-m8	-0.02	47	-0.02	0.099	N/A
hsa-miR-514b-5p	428-434	7mer-1A	-0.08	85	-0.08	0.085	N/A
hsa-miR-513c-5p	428-434	7mer-1A	-0.07	83	-0.07	0.085	N/A
hsa-miR-5700	439-446	8mer	-0.03	62	-0.03	0	N/A
hsa-miR-610	444-451	8mer	-0.3	96	-0.3	0.024	N/A
hsa-miR-3609	449-455	7mer-m8	-0.08	84	-0.08	0	N/A
hsa-miR-548ah-5p	449-455	7mer-m8	-0.04	71	-0.04	0	N/A
hsa-miR-3646	454-461	8mer	-0.03	77	-0.03	0	N/A
hsa-miR-1252-3p	455-461	7mer-1A	-0.02	64	-0.02	0	N/A
hsa-miR-1246	461-467	7mer-m8	-0.16	88	-0.16	0.024	N/A
hsa-miR-500b-5p	471-477	7mer-m8	-0.12	82	-0.12	0.118	N/A
hsa-miR-362-5p	471-477	7mer-m8	-0.09	74	-0.09	0.118	N/A
hsa-miR-4793-5p	473-479	7mer-1A	-0.13	83	-0.13	0	N/A
hsa-miR-5196-3p	473-479	7mer-1A	-0.01	38	-0.01	0	N/A
hsa-miR-4422	481-487	7mer-m8	-0.02	57	-0.02	0	N/A
hsa-miR-3185	486-492	7mer-1A	-0.06	75	-0.06	0	N/A
hsa-miR-3611	488-494	7mer-m8	-0.15	89	-0.15	0	N/A
hsa-miR-4693-5p	491-498	8mer	-0.32	97	-0.32	0	N/A
hsa-miR-4318	491-497	7mer-1A	-0.17	88	-0.17	0	N/A
hsa-miR-892a	491-497	7mer-1A	-0.13	86	-0.13	0.024	N/A
hsa-miR-4424	496-502	7mer-1A	-0.15	76	-0.15	0	N/A
hsa-miR-4682	497-503	7mer-m8	-0.18	92	-0.18	0	N/A
hsa-miR-203b-3p	501-508	8mer	-0.24	96	-0.24	0	N/A
hsa-miR-7158-3p	502-508	7mer-1A	-0.1	83	-0.1	0	N/A
hsa-miR-1278	508-514	7mer-1A	-0.09	71	-0.09	0.024	N/A
hsa-miR-6806-5p	523-530	8mer	-0.41	94	-0.41	0	N/A
hsa-miR-1183	526-532	7mer-m8	-0.12	84	-0.12	0.099	N/A
hsa-miR-1208	528-534	7mer-1A	-0.08	82	-0.08	0	N/A
hsa-miR-6760-3p	528-534	7mer-1A	-0.08	78	-0.08	0	N/A
hsa-miR-499a-3p	531-537	7mer-m8	-0.17	92	-0.17	0.085	N/A
hsa-miR-499b-3p	531-537	7mer-m8	-0.17	92	-0.17	0.085	N/A
hsa-miR-369-5p	544-550	7mer-1A	-0.26	85	-0.26	0	N/A
hsa-miR-4422	550-556	7mer-m8	-0.02	57	-0.02	0	N/A
hsa-miR-3185	555-561	7mer-1A	-0.07	75	-0.07	0	N/A
hsa-miR-4709-3p	556-562	7mer-1A	-0.04	65	-0.04	0	N/A
hsa-miR-4635	557-563	7mer-m8	-0.07	83	-0.07	0	N/A
hsa-miR-6879-3p	563-569	7mer-1A	-0.08	61	-0.08	0	N/A
hsa-miR-6773-3p	564-570	7mer-m8	-0.13	83	-0.13	0	N/A
hsa-miR-3684	569-576	8mer	-0.39	96	-0.39	0	N/A
hsa-miR-7702	571-577	7mer-1A	-0.09	67	-0.09	0	N/A
hsa-miR-4753-3p	575-581	7mer-m8	-0.04	69	-0.04	0	N/A
hsa-miR-130b-5p	575-581	7mer-1A	-0.03	63	-0.03	0.085	N/A
hsa-miR-6873-3p	577-584	8mer	-0.25	94	-0.25	0	N/A
hsa-miR-6817-3p	577-583	7mer-1A	-0.09	74	-0.09	0	N/A
hsa-miR-7110-3p	577-583	7mer-1A	-0.07	64	-0.07	0	N/A
hsa-miR-6833-3p	578-584	7mer-m8	-0.14	88	-0.14	0	N/A
hsa-miR-4768-5p	578-584	7mer-m8	-0.13	88	-0.13	0	N/A
hsa-miR-942-5p	579-586	8mer	-0.16	91	-0.16	0.024	N/A
hsa-miR-4659a-3p	581-587	7mer-m8	-0.06	72	-0.06	0	N/A
hsa-miR-4659b-3p	581-587	7mer-m8	-0.06	72	-0.06	0	N/A
hsa-miR-4320	584-591	8mer	-0.23	93	-0.23	0	N/A
hsa-miR-6839-5p	586-592	7mer-m8	-0.09	77	-0.09	0.402	N/A
hsa-miR-378j	586-592	7mer-m8	-0.07	67	-0.07	0.402	N/A
hsa-miR-4308	588-595	8mer	-0.42	99	-0.42	0	N/A
hsa-miR-4292	589-595	7mer-1A	-0.18	86	-0.18	0	N/A
hsa-miR-6791-5p	589-595	7mer-1A	-0.14	78	-0.14	0	N/A
hsa-miR-670-5p	590-596	7mer-1A	-0.07	81	-0.07	0	N/A
hsa-miR-642b-5p	591-598	8mer	-0.24	93	-0.24	0	N/A
hsa-miR-1266-3p	594-600	7mer-m8	-0.18	89	-0.18	0	N/A
hsa-miR-6852-3p	602-609	8mer	-0.36	96	-0.36	0	N/A
hsa-miR-3909	602-609	8mer	-0.38	96	-0.38	0	N/A
hsa-miR-3908	608-614	7mer-m8	-0.08	88	-0.08	0	N/A
hsa-miR-548e-5p	611-617	7mer-m8	-0.02	39	-0.02	0	N/A
hsa-miR-6079	621-627	7mer-1A	-0.06	75	-0.06	0	N/A
hsa-miR-6813-3p	624-630	7mer-m8	-0.16	86	-0.16	0	N/A
hsa-miR-6760-5p	643-649	7mer-m8	-0.16	86	-0.16	0	N/A
hsa-miR-6754-5p	644-651	8mer	-0.35	98	-0.35	0	N/A
hsa-miR-4441	644-651	8mer	-0.35	98	-0.35	0	N/A
hsa-miR-4270	644-651	8mer	-0.31	97	-0.31	0	N/A
hsa-miR-211-3p	645-651	7mer-1A	-0.01	49	-0.01	0	N/A
hsa-miR-6755-3p	649-656	8mer	-0.32	94	-0.32	0	N/A
hsa-miR-5010-3p	654-661	8mer	-0.09	83	-0.09	0	N/A
hsa-miR-2113	655-661	7mer-1A	-0.01	42	-0.01	0	N/A
hsa-miR-6502-5p	662-668	7mer-m8	-0.22	86	-0.22	0	N/A
hsa-miR-1301-5p	662-668	7mer-m8	-0.16	78	-0.16	0	N/A
hsa-miR-6822-3p	663-670	8mer	-0.25	94	-0.25	0	N/A
hsa-miR-8057	664-670	7mer-m8	-0.08	85	-0.08	0	N/A
hsa-miR-760	664-670	7mer-1A	-0.19	84	-0.19	0.029	N/A
hsa-miR-149-5p	665-671	7mer-m8	-0.16	88	-0.16	0.029	N/A
hsa-miR-331-3p	668-674	7mer-m8	-0.06	69	-0.06	1.645	N/A
hsa-miR-210-5p	669-675	7mer-m8	-0.09	59	-0.09	0.085	N/A
hsa-miR-5008-5p	672-678	7mer-m8	-0.17	85	-0.17	0	N/A
hsa-miR-3192-5p	685-692	8mer	-0.25	96	-0.25	0.024	N/A
hsa-miR-204-3p	686-692	7mer-1A	-0.08	87	-0.08	0	N/A
hsa-miR-4646-5p	686-692	7mer-1A	-0.12	86	-0.12	0	N/A
hsa-miR-6506-5p	686-692	7mer-1A	-0.07	82	-0.07	0	N/A
hsa-miR-4314	686-692	7mer-m8	-0.1	66	-0.1	0	N/A
hsa-miR-619-5p	686-692	7mer-1A	-0.01	44	-0.01	0	N/A
hsa-miR-330-5p	687-693	7mer-m8	-0.15	87	-0.15	1.908	N/A
hsa-miR-326	687-693	7mer-m8	-0.15	86	-0.15	1.908	N/A
hsa-miR-6805-3p	689-695	7mer-m8	-0.11	79	-0.11	0	N/A
hsa-miR-5691	689-695	7mer-m8	-0.1	75	-0.1	0	N/A
hsa-miR-3194-3p	689-695	7mer-1A	-0.06	67	-0.06	0	N/A
hsa-miR-4742-5p	696-702	7mer-1A	-0.17	92	-0.17	0.024	N/A
hsa-miR-4514	696-702	7mer-1A	-0.16	89	-0.16	0	N/A
hsa-miR-6715b-5p	696-702	7mer-1A	-0.12	86	-0.12	0	N/A
hsa-miR-4692	696-702	7mer-1A	-0.13	84	-0.13	0	N/A
hsa-miR-4269	696-702	7mer-1A	-0.02	64	-0.02	0	N/A
hsa-miR-7159-3p	702-708	7mer-1A	-0.01	36	-0.01	0	N/A
hsa-miR-4482-3p	702-708	7mer-1A	-0.01	29	-0.01	0	N/A
hsa-miR-1252-3p	709-715	7mer-m8	-0.02	75	-0.02	0	N/A
hsa-miR-5680	711-718	8mer	-0.03	87	-0.03	0	N/A
hsa-miR-936	715-721	7mer-m8	-0.17	81	-0.17	0.024	N/A
hsa-miR-4773	719-725	7mer-m8	-0.17	94	-0.17	0	N/A
hsa-miR-3925-5p	721-728	8mer	-0.23	97	-0.23	0	N/A
hsa-miR-3123	722-728	7mer-1A	-0.05	82	-0.05	0	N/A
hsa-miR-1303	723-729	7mer-m8	-0.09	68	-0.09	0.024	N/A
hsa-miR-140-3p.1	730-736	7mer-1A	-0.18	90	-0.18	1.935	0.17
hsa-miR-483-3p.2	734-740	7mer-1A	-0.07	74	-0.07	1.19	N/A
hsa-miR-6794-3p	735-741	7mer-1A	-0.07	69	-0.07	0	N/A
hsa-miR-587	741-747	7mer-1A	-0.05	68	-0.05	0.024	N/A
hsa-miR-6505-5p	747-753	7mer-1A	-0.09	77	-0.09	0.085	N/A
hsa-miR-582-5p	752-758	7mer-m8	-0.08	79	-0.08	0.22	N/A
hsa-miR-6804-5p	763-769	7mer-m8	-0.29	91	-0.29	0	N/A
hsa-miR-6847-5p	766-772	7mer-1A	-0.15	86	-0.15	0	N/A
hsa-miR-4257	766-772	7mer-1A	-0.08	82	-0.08	0	N/A
hsa-miR-1225-5p	778-784	7mer-m8	-0.13	84	-0.13	0	N/A
hsa-miR-6861-5p	779-785	7mer-m8	-0.09	71	-0.09	0	N/A
hsa-miR-4463	782-788	7mer-m8	-0.08	84	-0.08	0	N/A
hsa-miR-873-3p	783-789	7mer-m8	-0.13	87	-0.13	0	N/A
hsa-miR-3658	788-794	7mer-1A	-0.01	36	-0.01	0	N/A
hsa-miR-4677-3p	808-814	7mer-m8	-0.22	94	-0.22	0	N/A
hsa-miR-141-3p	812-818	7mer-m8	-0.14	87	-0.14	0.496	< 0.1
hsa-miR-200a-3p	812-818	7mer-m8	-0.13	86	-0.13	0.496	< 0.1
hsa-miR-371a-5p	816-822	7mer-m8	-0.02	74	-0.02	0.774	N/A
hsa-miR-7158-5p	818-824	7mer-1A	-0.03	66	-0.03	0	N/A
hsa-miR-767-3p	819-825	7mer-m8	-0.11	78	-0.11	0	N/A
hsa-miR-383-3p	824-831	8mer	-0.12	87	-0.12	0	N/A
hsa-miR-3065-3p	825-831	7mer-1A	-0.01	44	-0.01	0	N/A
hsa-miR-3934-3p	828-834	7mer-1A	-0.04	48	-0.04	0	N/A
hsa-miR-218-5p	831-837	7mer-1A	-0.05	60	-0.05	2.858	0.27
hsa-miR-2113	832-838	7mer-m8	-0.05	78	-0.05	0	N/A
hsa-miR-1251-3p	835-841	7mer-1A	-0.05	66	-0.05	0.085	N/A
hsa-miR-632	839-845	7mer-m8	-0.22	96	-0.22	0.099	N/A
hsa-miR-4288	839-845	7mer-m8	-0.24	93	-0.24	0.099	N/A
hsa-miR-346	839-845	7mer-1A	-0.14	72	-0.14	1.842	N/A
hsa-miR-6790-5p	843-850	8mer	-0.34	98	-0.34	0	N/A
hsa-miR-4658	843-850	8mer	-0.31	98	-0.31	0	N/A
hsa-miR-574-5p	843-849	7mer-1A	-0.2	82	-0.2	0	N/A
hsa-miR-3659	843-849	7mer-1A	-0.12	77	-0.12	0	N/A
hsa-miR-4758-5p	844-850	7mer-1A	-0.15	89	-0.15	0	N/A
hsa-miR-1238-5p	844-850	7mer-1A	-0.13	86	-0.13	0	N/A
hsa-miR-4461	846-852	7mer-1A	-0.11	82	-0.11	0	N/A
hsa-miR-4729	850-856	7mer-m8	-0.02	55	-0.02	0	N/A
hsa-miR-1179	853-859	7mer-1A	-0.13	89	-0.13	0.099	N/A
hsa-miR-574-5p	866-872	7mer-m8	-0.4	97	-0.4	0	N/A
